# Supplementary material
Source: PubMed Central journal article supplement (PMC11331971)
Supplement: NIHMS2005361-supplement-Supplementary_material.pdf [file NIHMS2005361-supplement-Supplementary_material.pdf]

# Supplementary information

## TMPRSS2 is a functional receptor for human coronavirus HKU1

Nell Saunders<sup>1</sup>, Ignacio Fernandez<sup>2</sup>, Cyril Planchais<sup>3</sup>, Vincent Michel<sup>4</sup>, Maaran Michael Rajah<sup>1</sup>, Eduard Baquero Salazar<sup>5</sup>, Françoise Porrot<sup>1</sup>, Florence Guivel-Benhassine<sup>1</sup>, Jeanne Postal<sup>1</sup>, Catherine Blanc<sup>6</sup>, Gaëlle Chauveau-Le Fric<sup>7</sup>, Augustin Martin<sup>1</sup>, Ludivine Grzelak<sup>1</sup>, Maya Oktavia Rischa<sup>2</sup>, Annalisa Meola<sup>2</sup>, Olivia Ahouzi<sup>2</sup>, Hunter Hoover-Watson<sup>1</sup>, Matthieu Prot<sup>8</sup>, Deborah Delaune<sup>8,13</sup>, Marion Cornelissen<sup>9,10</sup>, Martin Deijis<sup>10,11</sup>, Hugo Mouquet<sup>3</sup>, Etienne Simon-Lorière<sup>8,14</sup>, Lia van der Hoek<sup>10,11</sup>, Pierre Lafaye<sup>7</sup>, Felix Rey<sup>2</sup>, Julian Buchrieser<sup>1,#,\*</sup> and Olivier Schwartz<sup>1,12,#,\*</sup>

<sup>1</sup>Virus & Immunity Unit, Institut Pasteur, Université de Paris Cité, CNRS UMR 3569, Paris, France

<sup>2</sup>Structural Virology Unit, Institut Pasteur, Université de Paris Cité, CNRS UMR 3569, Paris, France

<sup>3</sup>Humoral Immunology Unit, Institut Pasteur, Université de Paris Cité, INSERM U1222, Paris, France

<sup>4</sup>Pathogenesis of Vascular Infections Unit, Institut Pasteur, INSERM, Paris, France.

<sup>5</sup>Nanoimaging core, Institut Pasteur, Université de Paris Cité, INSERM U1222, Paris, France

<sup>6</sup>Pasteur-TheraVectys Joint Lab, Institut Pasteur, Université de Paris Cité, Paris, France

<sup>7</sup>Antibody Engineering Platform, C2RT, Institut Pasteur, Université de Paris Cité, CNRS UMR 3528, Paris, France.

<sup>8</sup>G5 Evolutionary Genomics of RNA Viruses, Institut Pasteur, Paris, France.

<sup>9</sup>Department of Medical Microbiology and Infection Prevention, Amsterdam UMC, Molecular Diagnostic Unit, University of Amsterdam, 1105 AZ Amsterdam, Netherlands.

<sup>10</sup>Amsterdam Institute for Infection and Immunity, Amsterdam, The Netherlands

<sup>11</sup>Department of Medical Microbiology and Infection Prevention, Amsterdam UMC, Laboratory of Experimental Virology, University of Amsterdam, 1105 AZ Amsterdam, Netherlands.

<sup>12</sup>Vaccine Research Institute, Creteil, France

<sup>13</sup>Institut de Recherche Biomédicale des Armées, Brétigny-sur-Orge, France

<sup>14</sup>National Reference Center for viruses of respiratory infections, Institut Pasteur, Paris, France.

#Co-last authors

\*Corresponding authors

## Table of content

**Supplementary movie 1.** Time lapse microscopy of TMPRSS2-scarlet-I (red) and HKU1A S-NeonGreen (green) expressing cells. 293T cells were transfected either with TMPRSS2-scarlet-I or HKU1A S-NeonGreen. At 24 h post transfection, the cells were mixed and imaged every 150 seconds for 2.5 h at 37°C, 5% CO<sub>2</sub>. Two representative movies are shown.

**Supplementary movie 2.** Time lapse microscopy of TMPRSS2-scarlet-I (red) and HKU1A S-NeonGreen (green) expressing cells. 293T cells were transfected either with TMPRSS2-scarlet-I or HKU1A S-NeonGreen. At 24 h post transfection, the cells were mixed and imaged every 150 seconds for 2.5 h at 37°C, 5% CO<sub>2</sub>. Two representative movies are shown.

**Supplementary information 1. a,b. c. d.** Full western blot membranes (a,b. Fig. 2, c,d. Extended Data Fig. 4) ..... **3**

**Supplementary information 2. a. b. c.** Quality control gels of the purified proteins. **d.** Expected molecular weights and glycosylation sites.....**4**

**Supplementary information 3.** Gating strategy.....**5**

**Supplementary information 4.** Sequence of the VHH.....**6**

**Supplementary information 5. a. b. c. d.** Complete BLI data used for fitting and determination of the affinity of TMPRSS2 for HKU1 RBD.....**7**

**Supplementary information 6.** K<sub>d</sub>, 95% confidence interval, R<sup>2</sup> of the fit, and range of the concentration of TMPRSS2.....**8**

# Supplementary information 1

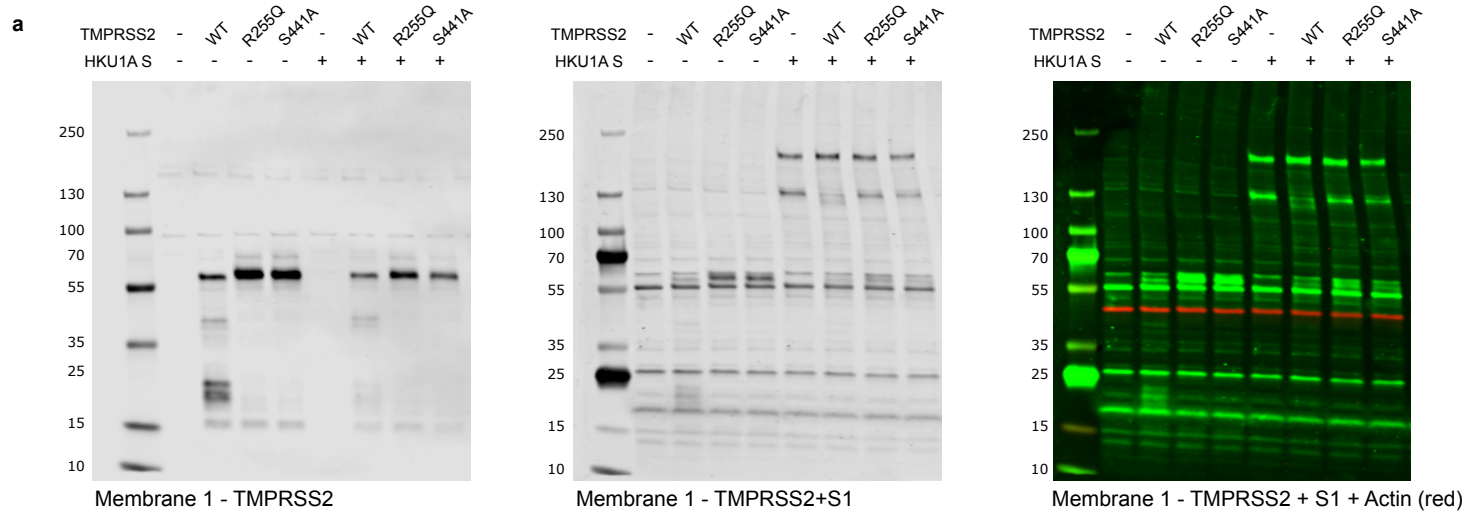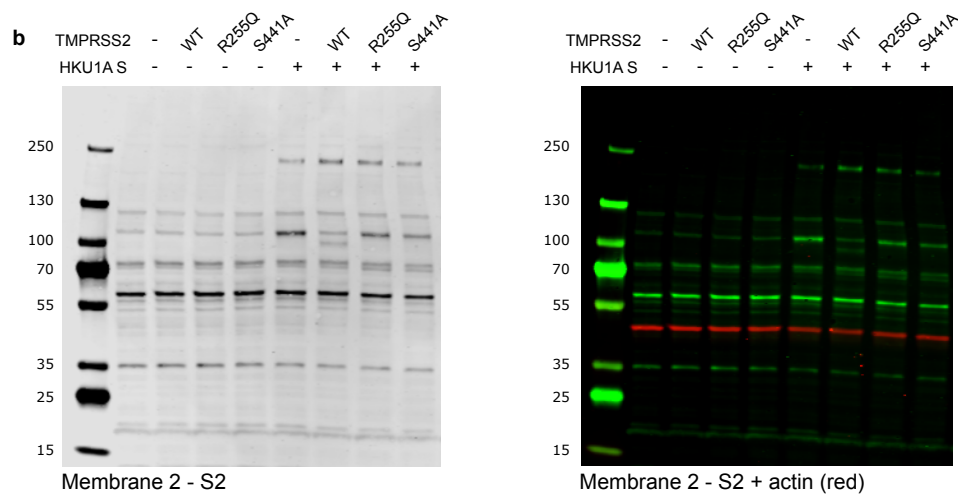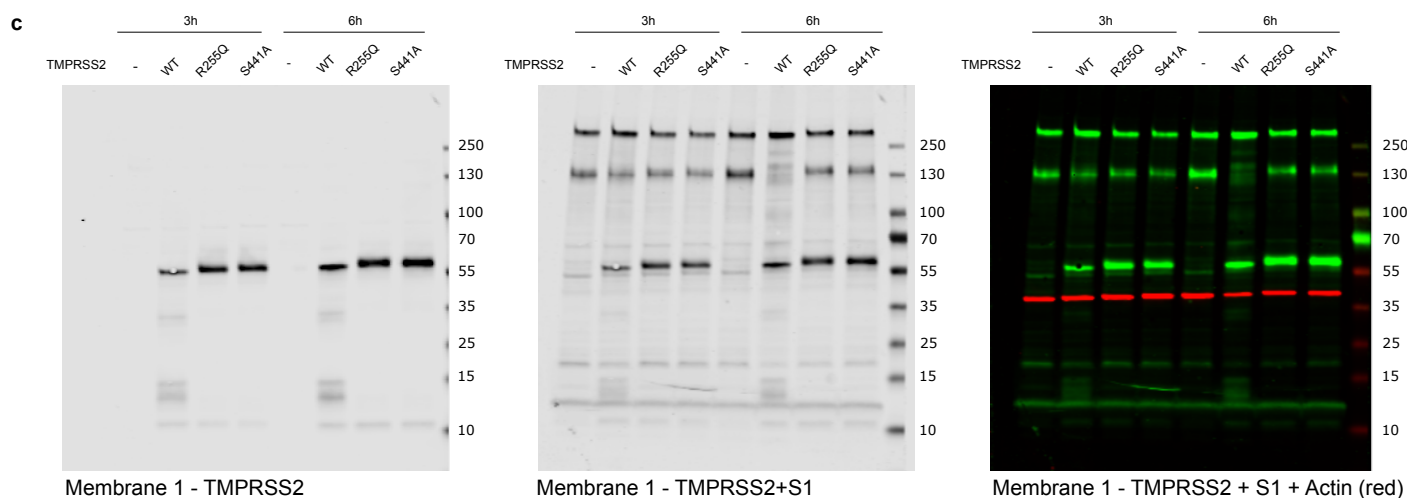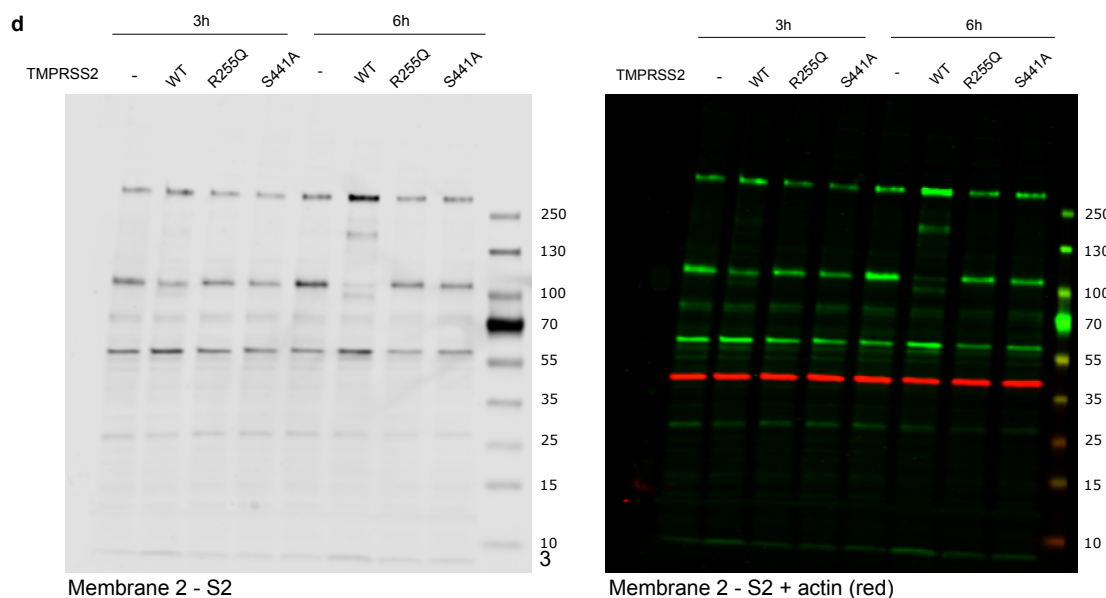

# Supplementary information 2

**a**

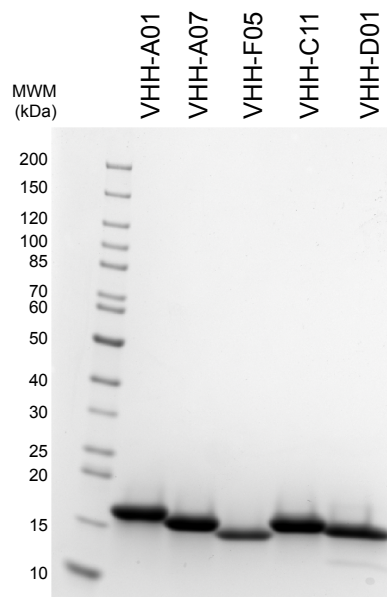

**b**

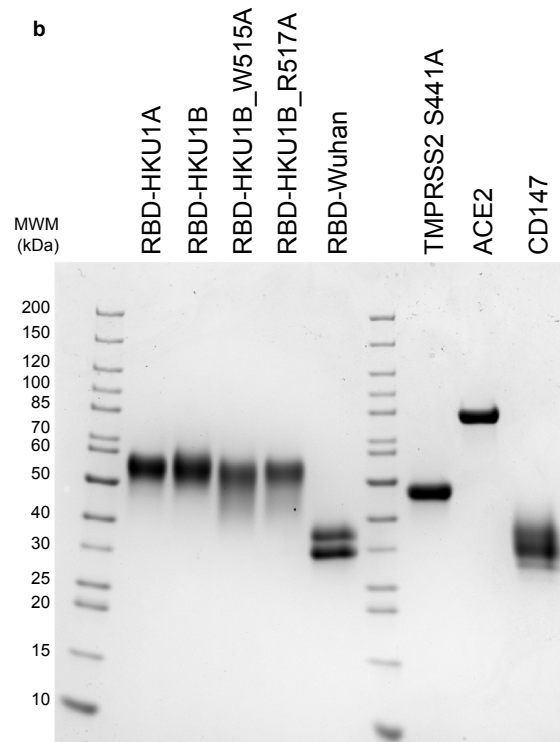

**c**

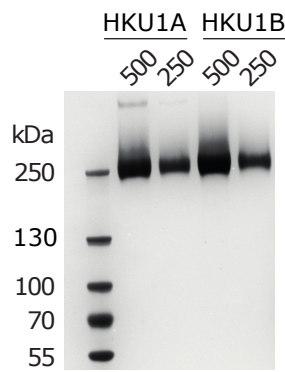

**d**

| Protein         | Expected MW (kDa) | Number of glycosylation sites |
|-----------------|-------------------|-------------------------------|
| VHH-A01         | 15.3              | -                             |
| VHH-A07         | 15.5              | -                             |
| VHH-F05         | 14.7              | -                             |
| VHH-C11         | 15.5              | -                             |
| VHH-D01         | 15.2              | -                             |
| RBD-HKU1A       | 37.1              | 5                             |
| RBD-HKU1B       | 36.7              | 5                             |
| RBD-HKU1B-W515A | 36.7              | 5                             |
| RBD-HKU1B-R517A | 36.7              | 5                             |
| RBD-SARS-CoV-2  | 27.3              | 1                             |
| TMPRSS2 S441A   | 46.9              | 2                             |
| ACE2            | 70.0              | 6                             |
| CD147           | 22.5              | 3                             |
| S-HKU1A         | 148.2             | 28                            |
| S-HKU1B         | 145.2             | 30                            |



Supplementary information 3

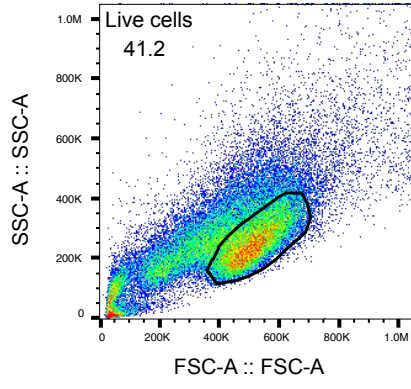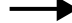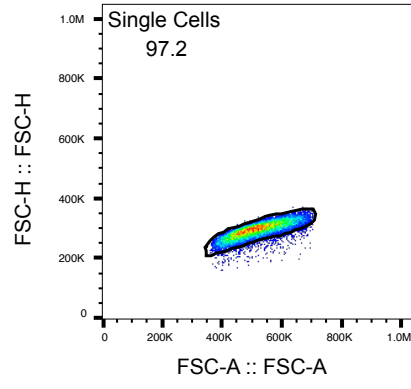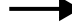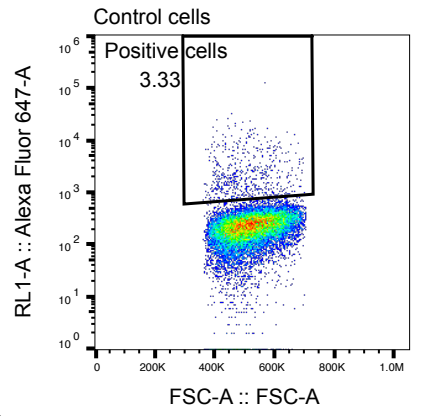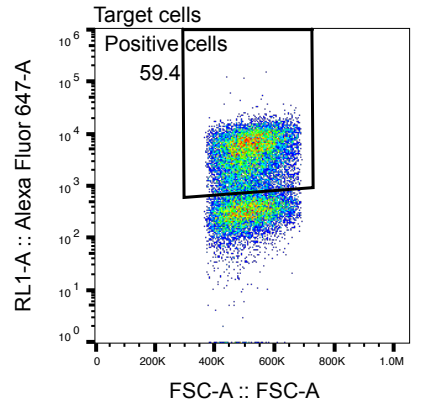

## VHH Sequences

### Monomeric VHH sequences :

```

>A01
QVQLVESGGGLVQPGGSLRLSCVVSSGFSLDYYAIGWFRQAPGKEREGVSCIGSSGDKTNYADSVKGRFTISRDNAK
NTVYLQMNSLKPEDTAVYYCAAESALYSDCTEEQNPMLYDYWGQGTQVTVSS
>A07
QVQLVESGGGLVQPGGSLRLSCTSSSGSPLEHYDIHWFRQAPGREREGVSSITTSGGHTNYADSVKGRFTISRDNAKN
VVYLQMNSLKPEDTAVYYCAGRVGGRRNWIVPLDGYDNAYWGQGTQVTVSS
>C11
QVQLVESGGGLVQPGGSLRLSCAASGFTLDYYDIYWFRQAPGKEREGVSSITTSGGRTNYADSVKGRFTISRDNAK
NTVYLQMNSLKPEDTAVYYCAAKVGRRNWIAPLNGYENALWGKGTLTVSS
>D01
EVQLVESGGGLVQPGGPLRLSCASSGSTLEHYDIGWFRQVPGGLREGVSSITASGGRTNYADSVKGRFTISRDNGKN
AVYLQMNSLKPEDTAVYYCAGKIGRRNWVAPLDGFENAYWGQGTQVTVSS
>F05
EVQLVESGGGLVQPGGSLRLSCAASGFTLDYYAIGWFRQAPGKEREGVSCISSSGDSIKYVDSVKGRFTISRDNAKN
TVYLQMNSLKPEDTAVYQCAADALGSGCLTGNYDYWGQGTRVTVSS
CDR1-CDR2-CDR3

```

### VHH-Fc sequences :

```

>TMPR-A1-Fc-humain (VHH-A01-Fc)
QVQLVESGGGLVQPGGSLRLSCVVSSGFSLDYYAIGWFRQAPGKEREGVSCIGSSGDKTNYADSVKGRFTISRDNAK
NTVYLQMNSLKPEDTAVYYCAAESALYSDCTEEQNPMLYDYWGQGTRVTVSSSEPKTPKPQPAAARSDKTHCPPCP
APELLGGPSVFLFPPKPDTLMISRTPEVTCVVVDVSHEDPEVKFNWYVDGVEVHNATKPREEQYNSTYRVVSVLVLHQ
DWLNGKEYKCKVSNKALPAPIEKTISKAKGQPREQVYTLPPSREEMTKNQVSLTCLVKGFYPSDIAVEWESNGQPENNYK
TTPPVLDSDGSFFLYSKLTVDKSRWQQGNVFSCVMHEALHNHYTQKSLSLSPGK

```

# Supplementary information 5

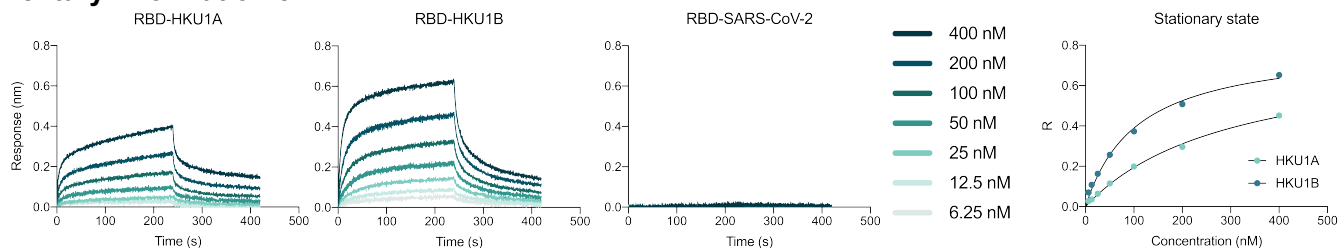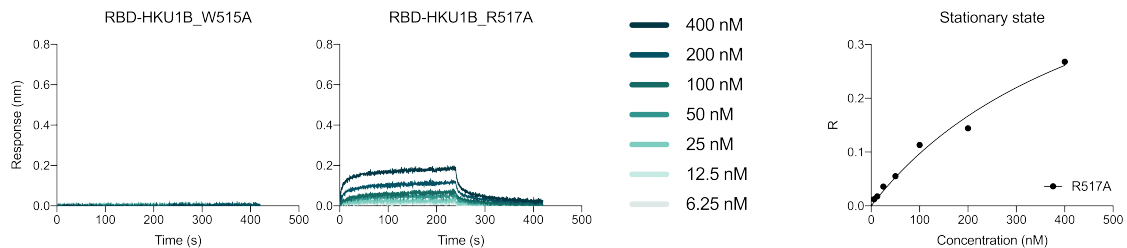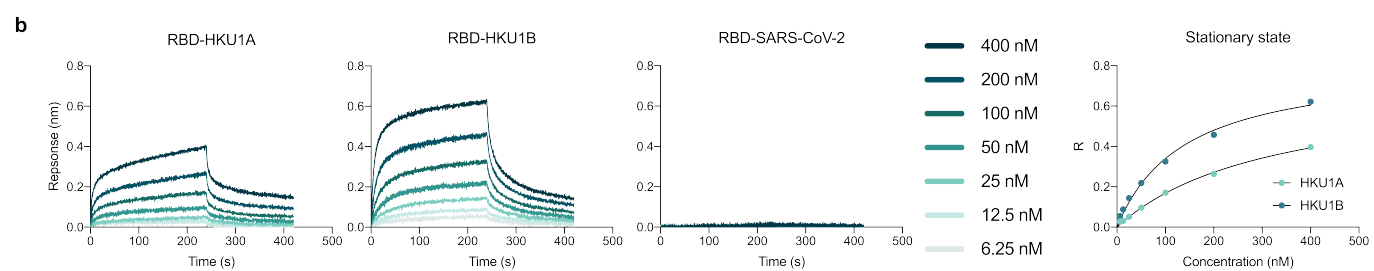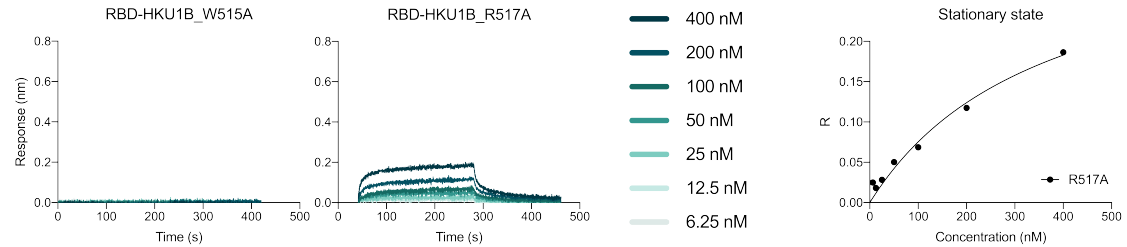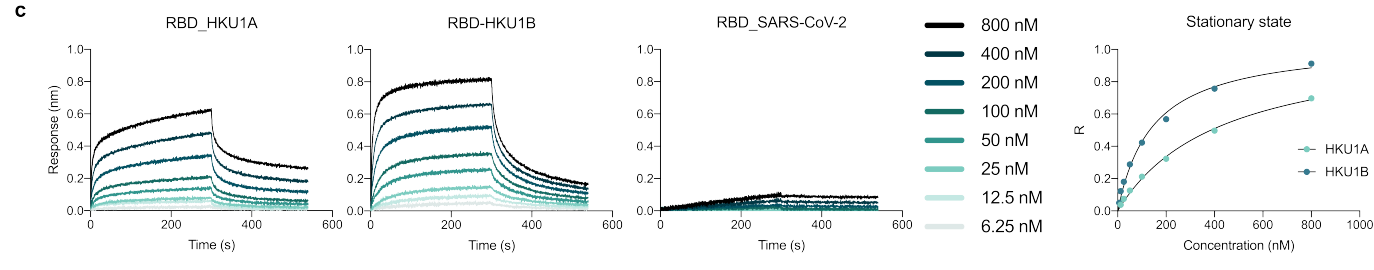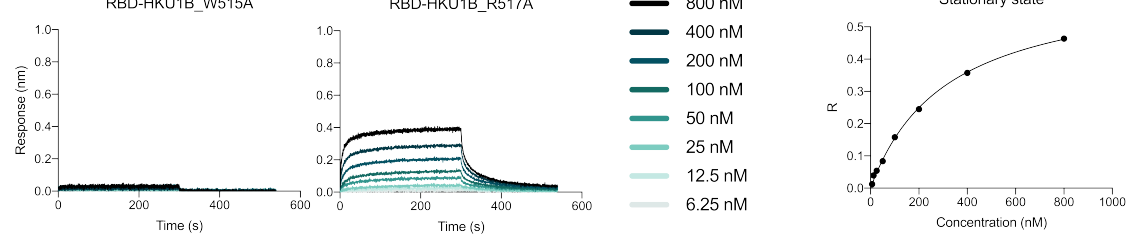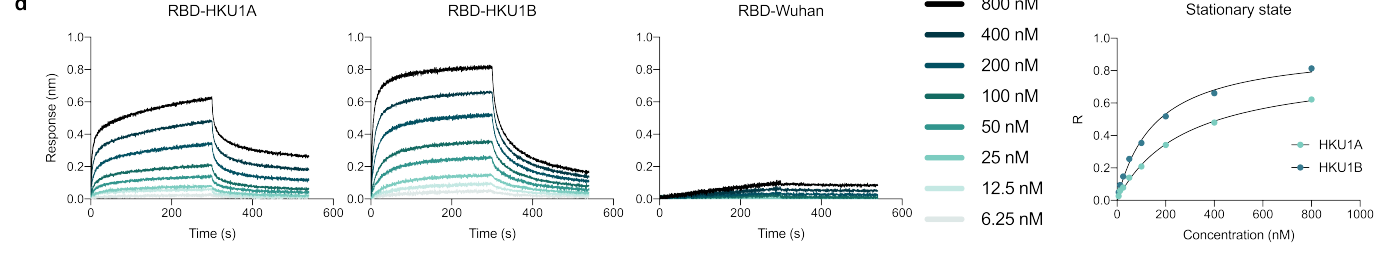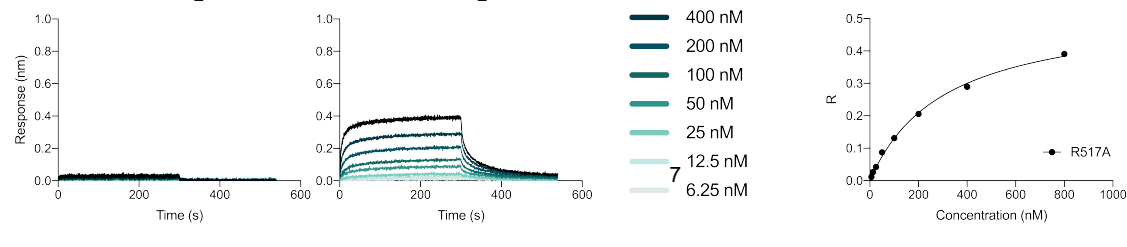

**Supplementary table 1**

| <b>Replicate</b> | <b>RBD</b>  | <b>Kd</b> | <b>95% CI</b>  | <b>R<sup>2</sup></b> | <b>Range tested</b> |
|------------------|-------------|-----------|----------------|----------------------|---------------------|
| 1                | HKU1A       | 304.5     | 226.6 to 433.3 | 0.9967               | 6.25-400 nM         |
| 2                | HKU1A       | 232.1     | 245.1 to 440   | 0.9975               | 6.25-400 nM         |
| 3                | HKU1A       | 430.1     | 328.6 to 574.4 | 0.9965               | 6.25-800 nM         |
| 4                | HKU1A       | 279.6     | 221.1 to 356.9 | 0.9964               | 6.25-800 nM         |
| 1                | HKU1B       | 106.9     | 75.9 to 152.6  | 0.9922               | 6.25-400 nM         |
| 2                | HKU1B       | 140.6     | 94.9 to 213.5  | 0.9913               | 6.25-400 nM         |
| 3                | HKU1B       | 144.2     | 107.6 to 194.2 | 0.9928               | 6.25-800 nM         |
| 4                | HKU1B       | 155.1     | 119.8 to 201.5 | 0.9945               | 6.25-800 nM         |
| 1                | HKU1B_R517A | 515.1     | 211.9 to 3327  | 0.9812               | 6.25-400 nM         |
| 2                | HKU1B_R517A | 363.8     | 150.8 to 1523  | 0.9735               | 6.25-400 nM         |
| 3                | HKU1B_R517A | 316.9     | 267.6 to 377.3 | 0.9983               | 6.25-800 nM         |
| 4                | HKU1B_R517A | 308.0     | 246.7 to 388.0 | 0.9971               | 6.25-800 nM         |
